# Supplementary material
Source: Springer Nature journal article supplement (https://www.springermedizin.de/resource/supplementary/13054_2012_921_MOESM2_ESM.pdf/9709308)
Supplement: MOESM2 [file 9709308]

**375** level 3 patients admitted to ICU  
(November 2008 – September 2009)

**104** died in the ICU  
**22** transferred from ICU to other  
hospitals  
**4** self-discharged or other

**245** level 3 patients identified for  
possible recruitment to cohort study  
before ICU discharge

**62 excluded**  
(by exclusion criteria)

- Non English-speaking (13)
- Chronic or continuing acute confusion (17)
- Inability to communicate (5)
- Not expected to survive hospital (17)
- GCS<15 (7)
- Under 18 years of age (3)

**183** patients eligible for recruitment  
to cohort study

**17** declined to participate  
**9** agreed to participate but subsequent  
deterioration of patient/other reasons  
prevented assessment

**157** level 3 patients were recruited  
and completed baseline assessment

**18** died after leaving ICU (in hospital or at  
home)  
**9** were homeless  
**9** still seriously ill in hospital  
**10** unable to complete assessment  
due to disabilities  
**11** did not respond/declined to  
participate

**100** patients remained in the study  
at three-month follow-up and were  
assessed for outcomes
